# Supplementary material for: A comparative study of the structures, thermal stabilities and energetic performances of two energetic regioisomers: 3(4)-(4-aminofurazan-3-yl)-4(3)-(4-nitrofurazan-3-yl)furoxan
Source: Royal Society of Chemistry journal article supplement (doi:10.1039/d0ra06186g), 2020-01-01
Supplement: d0ra06186g1.pdf [file d0ra06186g1.pdf]

## Supporting Information

### **A comparative study of the structures, thermal stabilities and energetic performances of two energetic regioisomers: 3(4)-(4-aminofurazan-3-yl)-4(3)-(4-nitrofurazan-3-yl)furoxan**

Jiarong Zhang<sup>a, c</sup>, Fuqiang Bi<sup>b, c \*</sup>, Lianjie Zhai<sup>c</sup>, Huan Huo<sup>c</sup>, Bozhou Wang<sup>c \*</sup>

<sup>a</sup>. School of Chemistry and Chemical Engineering, Beijing Institute of Technology, Beijing, 100081, PR China

<sup>b</sup>. Key Laboratory of Applied Surface and Colloid Chemistry, MOE / School of Chemistry and Chemical Engineering, Shaanxi Normal University, Xi'an 710062, PR China

<sup>c</sup>. Xi'an Modern Chemistry Research Institute, Xi'an 710065, PR China

Corresponding authors

Prof. Bozhou Wang

E-mail address: [wbz600@163.com](mailto:wbz600@163.com)

Dr. Fuqiang Bi

E-mail address: [bifuqiang@gmail.com](mailto:bifuqiang@gmail.com)

## NMR spectra

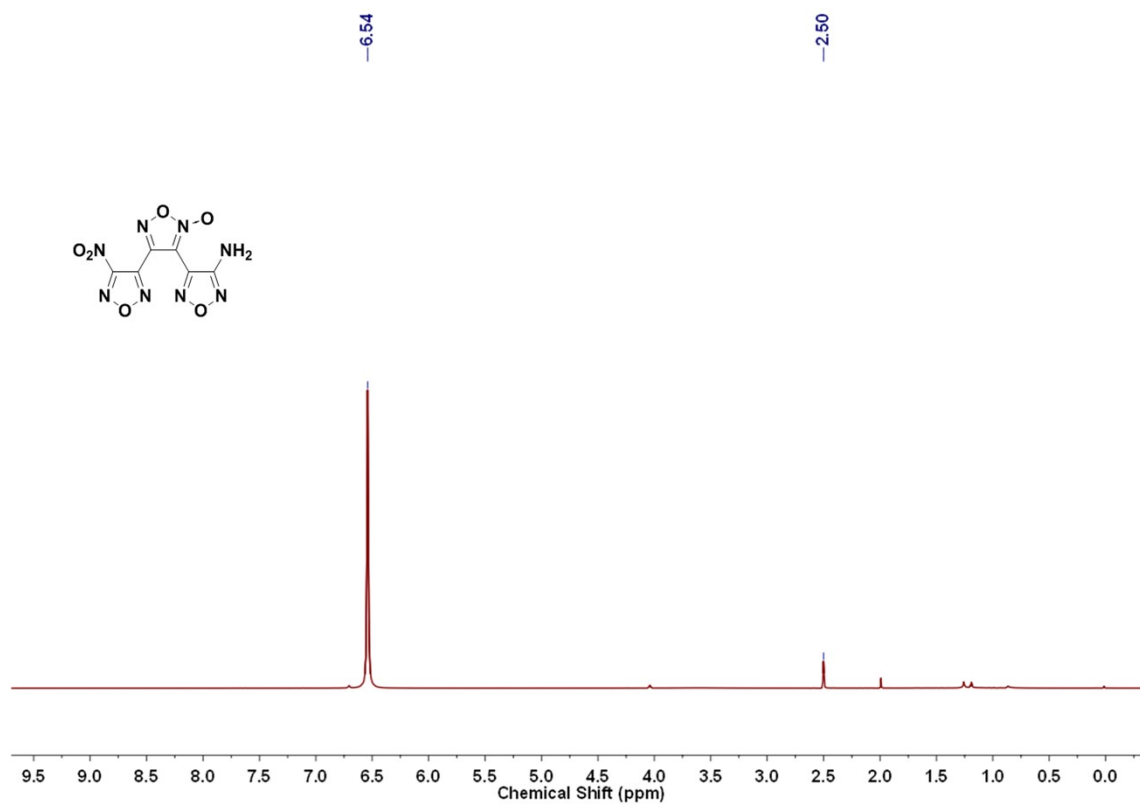

Figure S1. <sup>1</sup>H NMR spectrum of ANFF-34

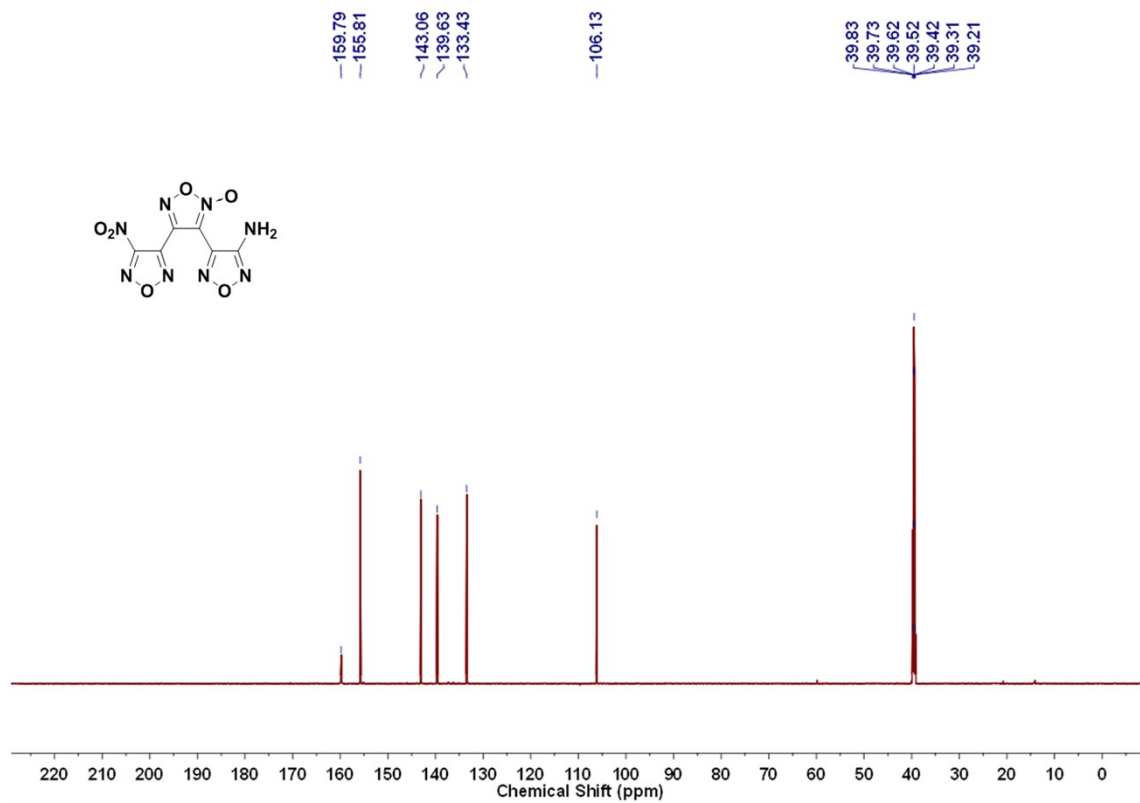

Figure S2. <sup>13</sup>C NMR spectrum of ANFF-34

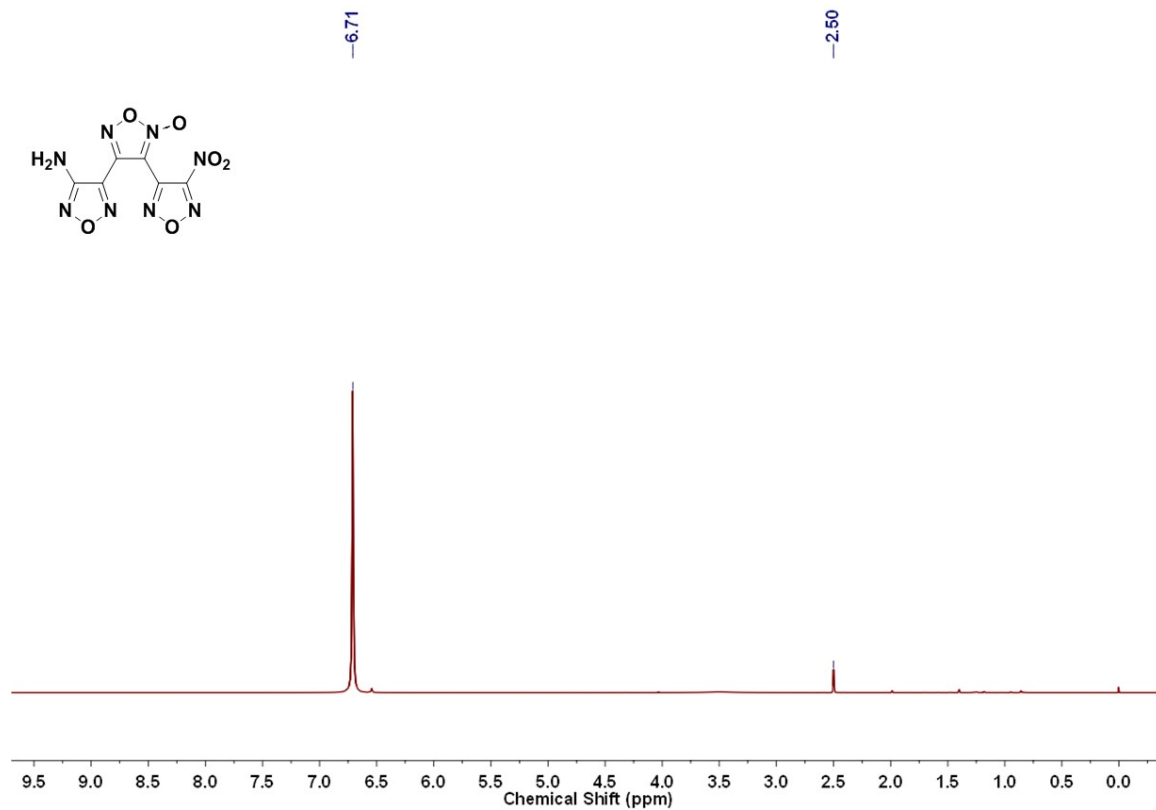

Figure S3.  $^1\text{H}$  NMR spectrum of ANFF-43

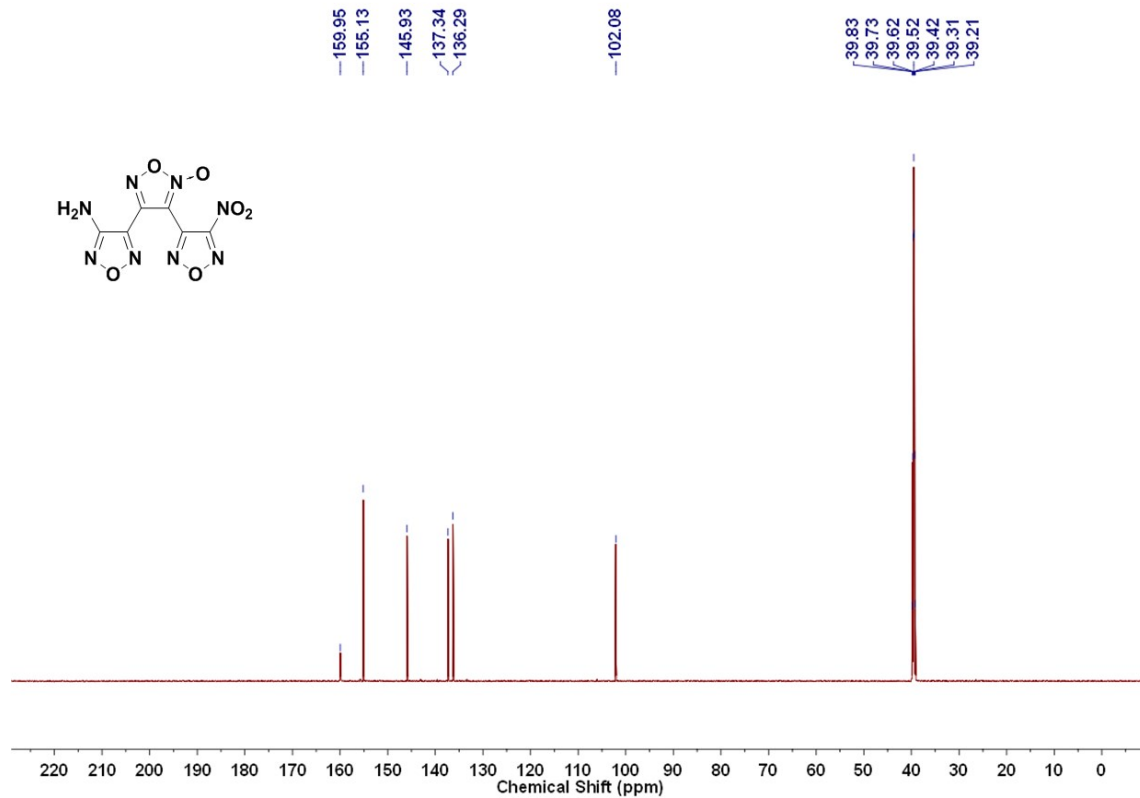

Figure S4.  $^{13}\text{C}$  NMR spectrum of ANFF-43

## Crystallographic data

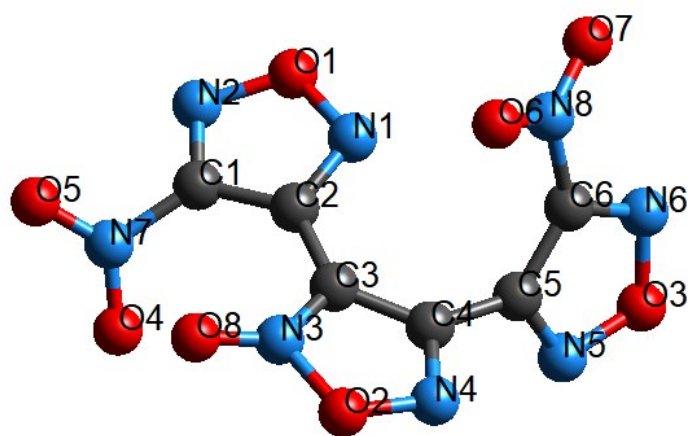

**Figure S5.** Single-crystal X-ray structures of DNTF

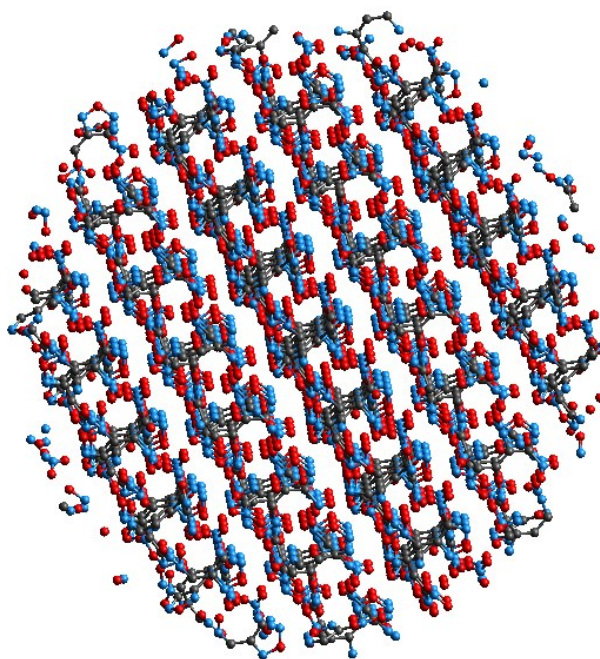

**Figure S6.** Crystal packing diagram of DNTF

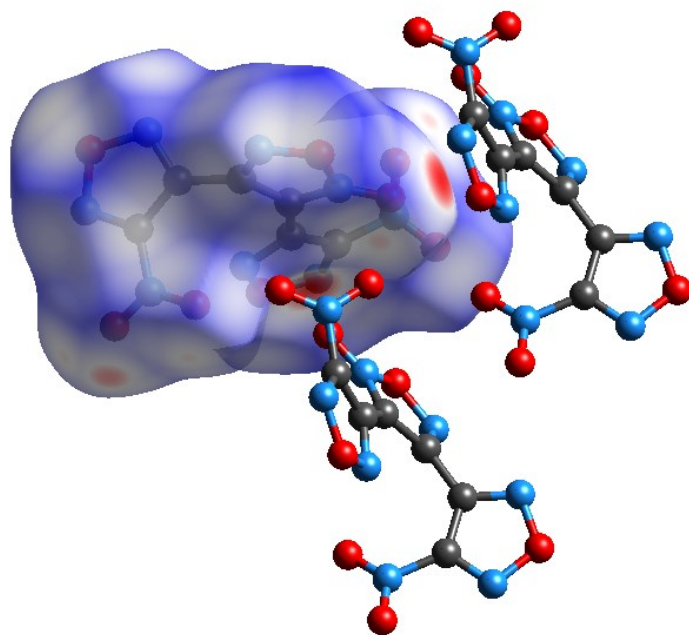

**Figure S7.** Hirshfeld surface of DNTF

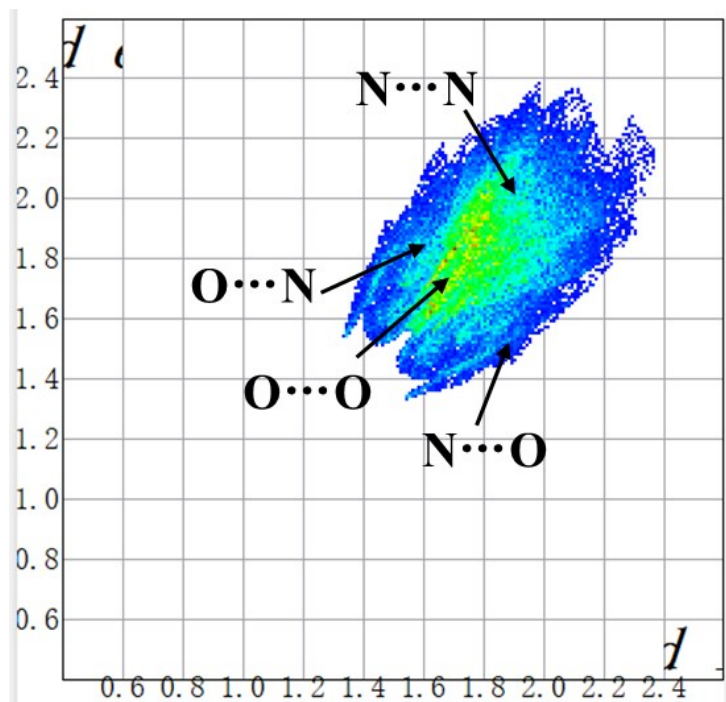

**Figure S8.** 2D fingerprint plot of DNTF

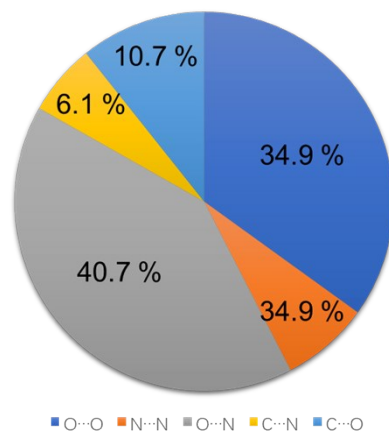

**Figure S9.** The contents of close interactions in DNTF

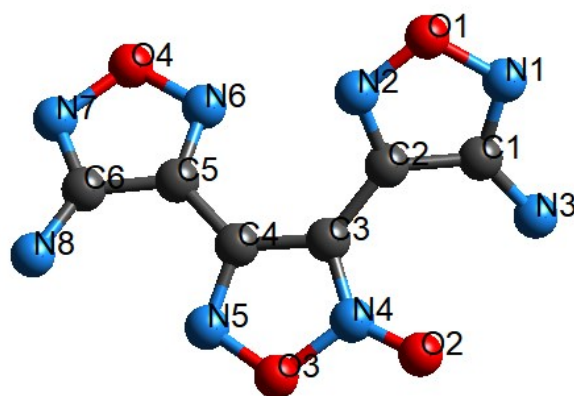

**Figure S10.** Single-crystal X-ray structures of DAFF

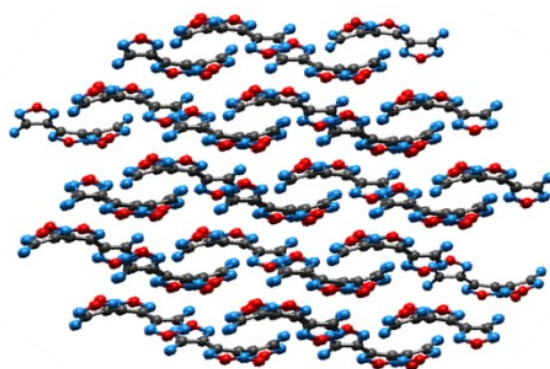

**Figure S11.** Crystal packing diagram of DAFF

## IR spectra

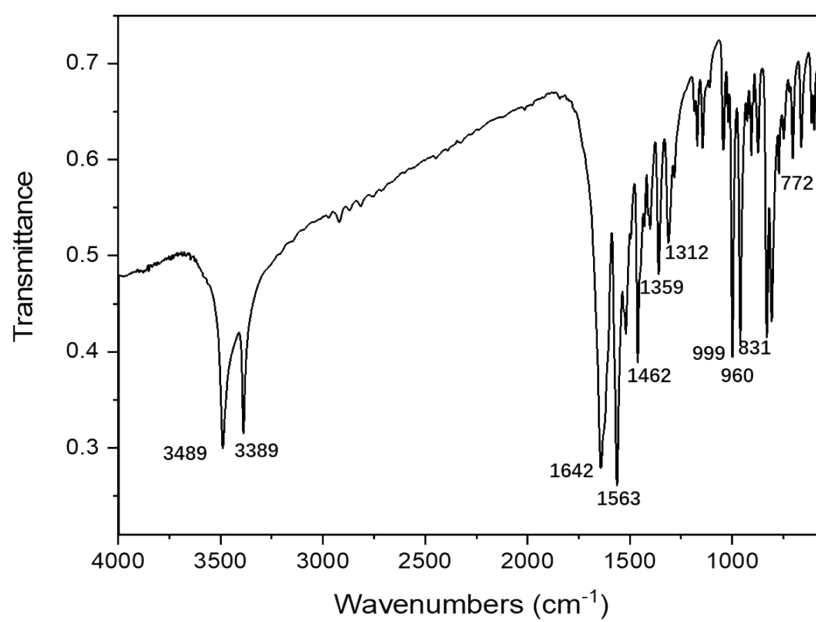

**Figure S12.** IR spectrum of ANFF-34

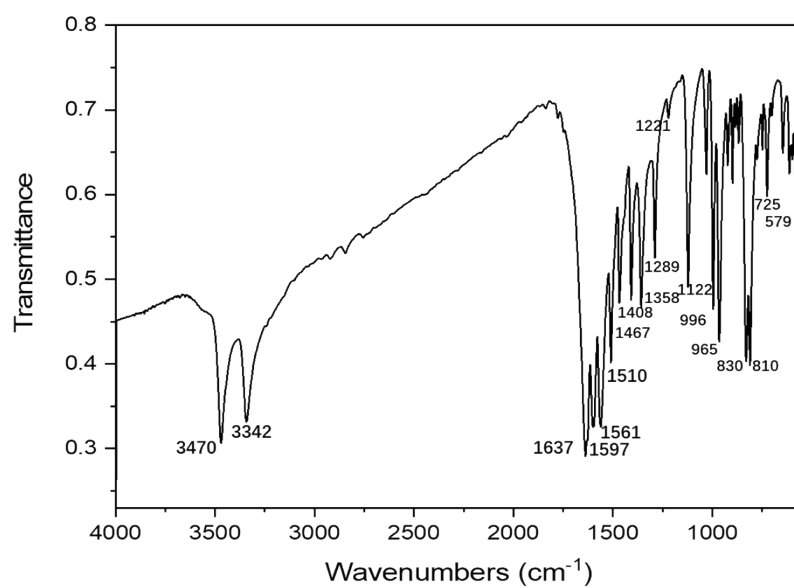

**Figure S13.** IR spectrum of ANFF-43

### The apparatus and conditions of crystal structure determination

A single crystal of ANFF-34 suitable for X-ray diffraction analysis was prepared by slow evaporation of ethyl acetate and petroleum ether solvent at room temperature. A colorless crystal with dimension of 0.35 x 0.29 x 0.15 mm was selected for X-ray single crystal diffraction analysis. The diffraction data were collected on a BRUKER SMART Apex II CCD X-ray diffractometer equipped with a Mo  $K\alpha$  radiation ( $\lambda=0.71073$  Å) using an  $\omega$ - $\theta$  scan mode at 296(2) K. A total of 5129 reflections were obtained in the range of  $2.53 \leq \theta \leq 25.09^\circ$ , of which 1855 were independent ( $R_{int}=0.0210$ ) were considered to be observed and used for the refinement. The structure was solved by direct methods and refined by full-matrix least-squares techniques on  $F^2$  using SHELES-97 and SHELXL-97 programs. A full-matrix least-squares refinement gave the final  $R_1=0.0371$  and  $\omega R_2=0.0883$  ( $\omega=1/[\sigma^2(F_o^2) + (0.0270 P)^2 + 0.0000 P]$ , where  $P=(F_o^2+2F_c^2)/3$ ). The goodness-of-fit on  $F^2$  is 1.027. The largest difference peak and hole were 0.166 and -0.159 e/Å<sup>3</sup>.

A single crystal of ANFF-43 suitable for X-ray diffraction analysis was prepared by slow evaporation of ethyl acetate and petroleum ether solvent at room temperature. A colorless crystal with dimension of 0.36 x 0.30 x 0.16 mm was selected for X-ray single crystal diffraction analysis. The diffraction data were collected on a BRUKER SMART Apex II CCD X-ray diffractometer equipped with a Mo  $K\alpha$  radiation ( $\lambda=0.71073$  Å) using an  $\omega$ - $\theta$  scan mode at 296(2) K. A total of 2650 reflections were obtained in the range of  $2.08 \leq \theta \leq 25.10^\circ$ , of which 1911 were independent ( $R_{int}=0.0273$ ) were considered to be observed and used for the refinement. The structure was solved by direct methods and refined by full-matrix least-squares techniques on  $F^2$  using SHELES-97 and SHELXL-97 programs. A full-matrix least-squares refinement gave the final  $R_1=0.0630$  and  $\omega R_2=0.2010$  ( $\omega=1/[\sigma^2(F_o^2) + (0.0270 P)^2 +$



0.0000  $P$ ], where  $P = (F_0^2 + 2F_c^2)/3$ . The goodness-of-fit on  $F^2$  is 1.024. The largest difference peak and hole were 0.358 and -0.386 e/Å<sup>3</sup>.

**Table S1.** Crystallographic data and structure refinement details for ANFF-34

| compound                         | ANFF-34     |
|----------------------------------|-------------|
| Chemical formula                 | C6 H2 N8 O6 |
| Crystal system                   | Monoclinic  |
| Space group                      | P2(1) / n   |
| $a/\text{Å}$                     | 7.7624(12)  |
| $b/\text{Å}$                     | 13.253(2)   |
| $c/\text{Å}$                     | 10.4256(16) |
| $\alpha/^\circ$                  | 90          |
| $\beta/^\circ$                   | 104.100(2)  |
| $\gamma/^\circ$                  | 90          |
| Volume/ Å <sup>3</sup>           | 1040.2(3)   |
| $Z$                              | 4           |
| Density/ g·cm <sup>3</sup>       | 1.802       |
| Temperature/K                    | 296(2) K    |
| Wavelength/ Å                    | 0.71073 Å   |
| F(000)                           | 568         |
| No. of reflections measured      | 5129        |
| No. of independent reflections   | 1855        |
| R(int)                           | 0.0210      |
| $R_1 (I > 2\sigma(I))$           | 0.0319      |
| $\omega R(F^2) (I > 2\sigma(I))$ | 0.0837      |
| $R_1$ (all reflections)          | 0.0371      |
| Goodness-of-fit on $F^2$         | 1.027       |
| CCDC number                      | 2012930     |

**Table S2.** Crystallographic data and structure refinement details for ANFF-43

| compound                   | ANFF-43     |
|----------------------------|-------------|
| Chemical formula           | C6 H2 N8 O6 |
| Crystal system             | Triclinic   |
| Space group                | P-1         |
| $a/\text{Å}$               | 6.188(8)    |
| $b/\text{Å}$               | 9.187(11)   |
| $c/\text{Å}$               | 10.300(13)  |
| $\alpha/^\circ$            | 71.902(18)  |
| $\beta/^\circ$             | 84.505(18)  |
| $\gamma/^\circ$            | 82.972(19)  |
| Volume/ Å <sup>3</sup>     | 551.3(12)   |
| $Z$                        | 2           |
| Density/ g·cm <sup>3</sup> | 1.700       |
| Temperature/K              | 296(2) K    |

|                                  |           |
|----------------------------------|-----------|
| Wavelength/ Å                    | 0.71073 Å |
| F(000)                           | 284       |
| No. of reflections measured      | 2650      |
| No. of independent reflections   | 1911      |
| R(int)                           | 0.0273    |
| $R_1 (I > 2\sigma(I))$           | 0.0630    |
| $\omega R(F^2) (I > 2\sigma(I))$ | 0.2010    |
| $R_1$ (all reflections)          | 0.0668    |
| Goodness-of-fit on $F^2$         | 1.024     |
| CCDC number                      | 2012931   |

**Table S3.** Selected bond lengths (Å) and bond angles (°) of compound ANFF-34

| Bond            | Dist. (Å)  | Bond             | Dist. (Å)  |
|-----------------|------------|------------------|------------|
| N(1)-O(1)       | 1.2035(18) | N(1)-O(2)        | 1.2195(17) |
| N(1)-C(1)       | 1.441(2)   | N(2)-C(1)        | 1.288(2)   |
| N(2)-O(3)       | 1.366(2)   | N(3)-C(2)        | 1.301(2)   |
| N(3)-O(3)       | 1.389(2)   | N(4)-C(3)        | 1.304(2)   |
| N(4)-O(4)       | 1.364(2)   | N(5)-O(5)        | 1.2224(18) |
| N(5)-C(4)       | 1.323(2)   | N(5)-O(4)        | 1.4519(18) |
| N(6)-C(5)       | 1.296(2)   | N(6)-O(6)        | 1.3594(17) |
| N(7)-C(6)       | 1.305(2)   | N(7)-O(6)        | 1.3955(19) |
| N(8)-C(6)       | 1.337(2)   | N(8)-H(8A)       | 0.86       |
| N(8)-H(8B)      | 0.86       | C(1)-C(2)        | 1.413(2)   |
| C(2)-C(3)       | 1.470(2)   | C(4)-C(5)        | 1.452(2)   |
| C(5)-C(6)       | 1.441(2)   |                  |            |
| Angle           | (°)        | Angle            | (°)        |
| O(2)-N(1)-O(1)  | 126.01     | O(2)-N(1)-C(1)   | 118.19     |
| O(2)-N(1)-C(1)  | 115.80     | O(3)-N(2)-C(1)   | 109.78     |
| O(3)-N(3)-C(2)  | 105.49     | O(4)-N(4)-C(3)   | 106.87     |
| C(4)-N(5)-O(5)  | 136.33     | O(4)-N(5)-O(5)   | 116.80     |
| O(4)-N(5)-C(4)  | 106.86     | O(6)-N(6)-C(5)   | 106.38     |
| O(6)-N(7)-C(6)  | 105.60     | H(8A)-N(8)-C(6)  | 120.0      |
| H(8B)-N(8)-C(6) | 120        | H(8B)-N(8)-H(8A) | 120        |
| N(3)-O(3)-N(2)  | 111.62     | N(5)-O(4)-N(4)   | 107.96     |
| N(7)-O(6)-N(6)  | 110.91     | C(2)-C(1)-N(2)   | 111.94     |
| N(1)-C(1)-N(2)  | 120.05     | N(1)-C(1)-C(2)   | 127.97     |
| C(3)-C(2)-C(1)  | 107.17     | C(3)-C(2)-N(3)   | 121.00     |
| C(3)-C(2)-C(1)  | 131.74     | C(4)-C(3)-N(4)   | 111.96     |
| C(2)-C(3)-N(4)  | 119.01     | C(2)-C(3)-C(4)   | 129.03     |
| C(3)-C(4)-N(5)  | 106.35     | C(5)-C(4)-N(5)   | 125.30     |
| C(5)-C(3)-C(3)  | 128.31     | C(6)-C(5)-N(6)   | 109.09     |
| C(4)-C(5)-N(6)  | 117.23     | C(4)-C(5)-C(6)   | 133.68     |
| N(8)-C(6)-N(7)  | 123.01     | C(5)-C(6)-N(7)   | 108.02     |
| C(5)-C(6)-N(8)  | 128.92     |                  |            |

**Table S4.** Hydrogen bond lengths (Å) and bond angles (°) of ANFF-34

| D-H...A     | d(D-H) (Å) | d(H...A) (Å) | d(D...A) (Å) | ∠DHA(°) |
|-------------|------------|--------------|--------------|---------|
| N8-H8A...O2 | 0.860      | 2.290        | 3.137        | 168.50  |
| N8-H8B...O5 | 0.860      | 2.122        | 2.872        | 145.41  |
| N8-H8B...N3 | 0.860      | 2.559        | 3.070        | 119.04  |

**Table S5.** Selected bond lengths (Å) and bond angles(°) of compound ANFF-43

| Bond            | Dist. (Å) | Bond              | Dist. (Å) |
|-----------------|-----------|-------------------|-----------|
| N(1)-O(1)       | 1.221(4)  | N(1)-O(2)         | 1.225(4)  |
| N(1)-C(1)       | 1.462(4)  | N(2)-C(1)         | 1.297(4)  |
| N(2)-O(3)       | 1.380(5)  | N(3)-C(2)         | 1.305(4)  |
| N(3)-O(3)       | 1.396(4)  | N(4)-O(4)         | 1.237(3)  |
| N(4)-C(3)       | 1.332(4)  | N(4)-O(5)         | 1.456(3)  |
| N(5)-C(4)       | 1.317(4)  | N(5)-O(5)         | 1.380(4)  |
| N(6)-C(5)       | 1.308(4)  | N(6)-O(6)         | 1.370(3)  |
| N(7)-C(6)       | 1.316(4)  | N(8)-C(6)         | 1.358(4)  |
| N(8)-H(8A)      | 0.86      | N(8)-H(8B)        | 0.86      |
| C(1)-C(2)       | 1.437(4)  | C(2)-C(3)         | 1.472(4)  |
| C(3)-C(4)       | 1.424(4)  | C(4)-C(5)         | 1.465(4)  |
| C(5)-C(6)       | 1.455(4)  |                   |           |
| Angle           | (°)       | Angle             | (°)       |
| O(2)-N(1)-O(1)  | 126.64    | C(1)-N(1)-O(1)    | 116.33    |
| C(1)-N(1)-O(2)  | 117.04    | O(3)-N(2)-C(1)    | 104.57    |
| O(3)-N(3)-C(2)  | 105.28    | C(3)-N(4)-O(4)    | 134.90    |
| O(5)-N(4)-O(4)  | 118.39    | O(5)-N(4)-C(3)    | 106.70    |
| O(5)-N(5)-C(4)  | 106.77    | O(6)-N(6)-C(5)    | 106.01    |
| O(6)-N(7)-C(6)  | 105.64    | H(8A)-N(8)-C(6)   | 120.0     |
| H(8B)-N(8)-C(6) | 120.0     | H(8B)-N(8)-H(8A)) | 120.0     |
| N(3)-O(3)-N(2)  | 111.60    | N(4)-O(5)-N(5)    | 108.06    |
| N(7)-O(6)-N(6)  | 111.03    | C(2)-C(1)-N(2)    | 110.50    |
| N(1)-C(1)-N(2)  | 121.32    | N(1)-C(1)-C(2)    | 128.14    |
| C(1)-C(2)-N(3)  | 108.05    | C(3)-C(2)-N(3)    | 121.02    |
| C(3)-C(2)-C(1)  | 130.92    | C(4)-C(3)-N(4)    | 106.91    |
| C(2)-C(3)-N(4)  | 121.20    | C(2)-C(3)-C(4)    | 131.89    |
| C(3)-C(4)-N(5)  | 111.52    | C(5)-C(4)-N(5)    | 120.76    |
| C(5)-C(4)-C(3)  | 127.52    | C(6)-C(5)-N(6)    | 109.61    |
| C(4)-C(5)-N(6)  | 120.59    | C(6)-C(5)-C(6)    | 129.66    |
| N(8)-C(6)-N(7)  | 124.92    | C(5)-C(6)-N(7)    | 107.69    |
| C(5)-C(6)-N(8)  | 127.36    |                   |           |

**Table S6.** Hydrogen bond lengths (Å) and bond angles (°) of ANFF-43

| D-H...A     | d(D-H) (Å) | d(H...A) (Å) | d(D...A) (Å) | ∠DHA(°) |
|-------------|------------|--------------|--------------|---------|
| N8-H8A...N7 | 0.860      | 2.365        | 3.171        | 156.29  |
| N8-H8B...N5 | 0.860      | 2.521        | 3.076        | 123.10  |

**Table S7.** Selected bond lengths (Å) and bond angles (°) of compound DNTF

| Bond      | Dist. (Å) | Bond      | Dist. (Å) |
|-----------|-----------|-----------|-----------|
| N(1)-O(1) | 1.377(3)  | N(2)-O(1) | 1.371(3)  |
| N(4)-O(2) | 1.371(3)  | N(3)-O(2) | 1.440(3)  |
| N(6)-O(3) | 1.369(3)  | N(5)-O(3) | 1.380(3)  |
| N(3)-O(8) | 1.199(3)  | N(7)-O(5) | 1.205(3)  |
| N(7)-O(4) | 1.211(3)  | N(8)-O(7) | 1.223(3)  |
| N(8)-O(8) | 1.220(3)  | N(1)-C(2) | 1.311(3)  |
| N(2)-C(2) | 1.288(3)  | N(3)-C(3) | 1.339(3)  |
| N(4)-C(4) | 1.306(3)  | N(5)-C(5) | 1.299(3)  |
| N(6)-C(6) | 1.296(3)  | N(7)-C(1) | 1.460(4)  |
| N(8)-C(6) | 1.455(3)  | C(1)-C(2) | 1.427(3)  |
| C(2)-C(3) | 1.445(3)  | C(3)-C(4) | 1.416(3)  |
| C(4)-C(5) | 1.472(4)  | C(5)-C(6) | 1.413(3)  |

**Table S8.** Selected bond lengths (Å) and bond angles (°) of compound DAFF

| Bond      | Dist. (Å) | Bond      | Dist. (Å) |
|-----------|-----------|-----------|-----------|
| N(1)-O(1) | 1.410(3)  | N(2)-O(1) | 1.374(3)  |
| N(4)-O(3) | 1.483(3)  | N(5)-O(3) | 1.361(3)  |
| N(4)-O(2) | 1.212(3)  | N(6)-O(4) | 1.367(3)  |
| N(7)-O(4) | 1.413(3)  | N(1)-C(1) | 1.310(3)  |
| N(2)-C(2) | 1.294(3)  | N(4)-C(3) | 1.318(3)  |
| N(5)-C(4) | 1.341(3)  | N(6)-C(5) | 1.293(3)  |
| N(7)-C(6) | 1.306(3)  | N(3)-C(1) | 1.346(4)  |
| N(8)-C(6) | 1.327(3)  | C(1)-C(2) | 1.443(3)  |
| C(2)-C(3) | 1.450(3)  | C(3)-C(4) | 1.432(3)  |
| C(4)-C(5) | 1.449(4)  | C(5)-C(6) | 1.439(3)  |
